# Supplementary material for: An explicit estimate of the atmospheric nutrient impact on global oceanic productivity
Source: Copernicus journal article supplement (doi:10.5194/os-2020-27), 2020-04-27
Supplement: Supplementary file 1 [file os-2020-27-supplement.pdf]

Supplement

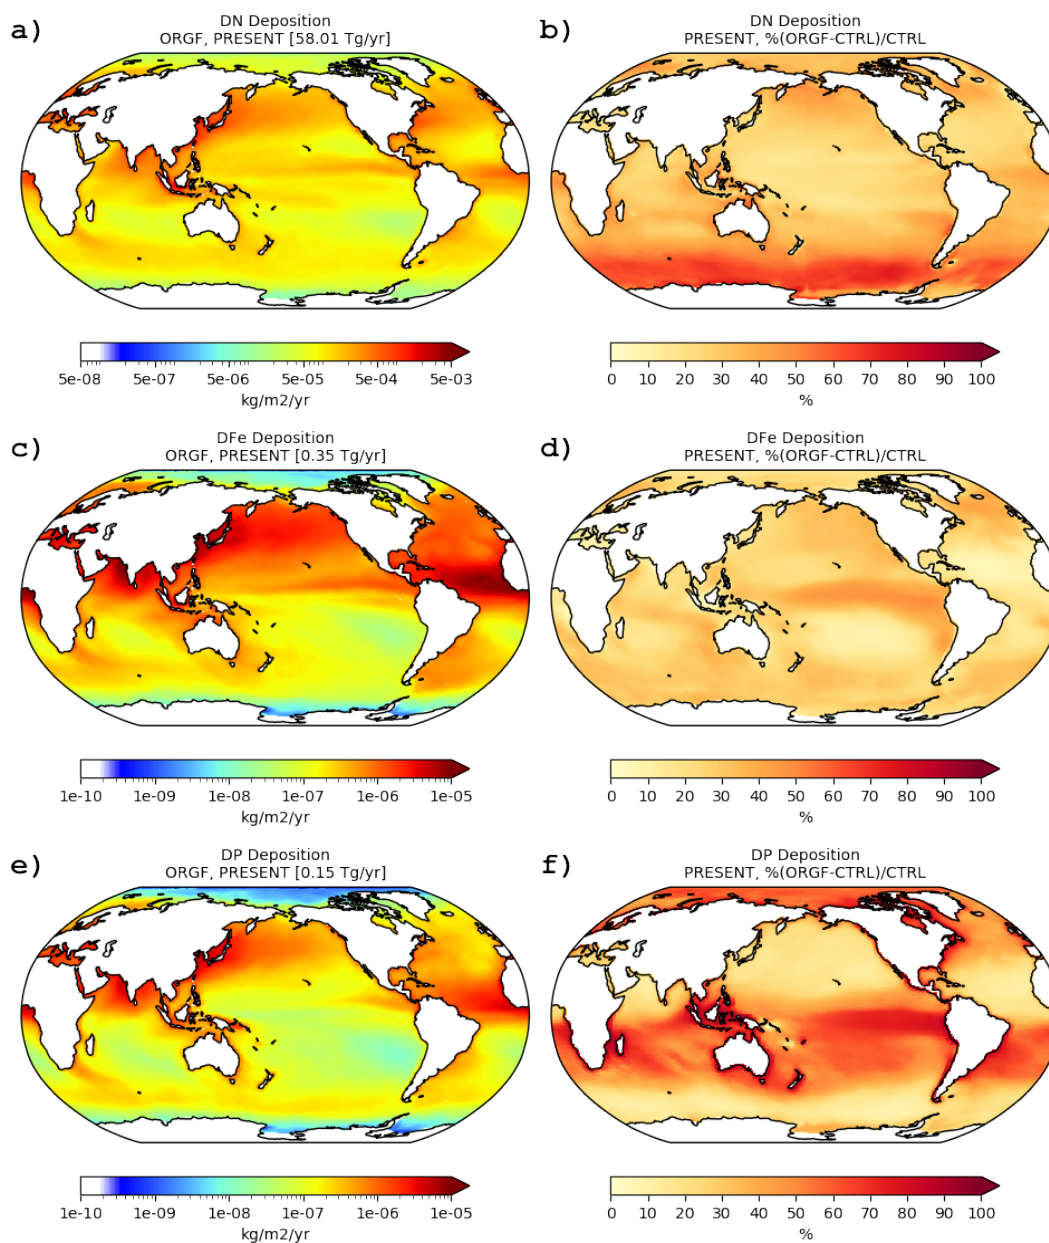

5 **Figure S1: Atmospheric deposition fluxes (left column) into the ocean of dissolved nitrogen (a), iron (c) and phosphorus (e) considered by the model for the ORGF simulation for PRESENT (2001–2020 average), and the respective percentage differences (b,d,f) compared to the CTRL simulation (right column).**

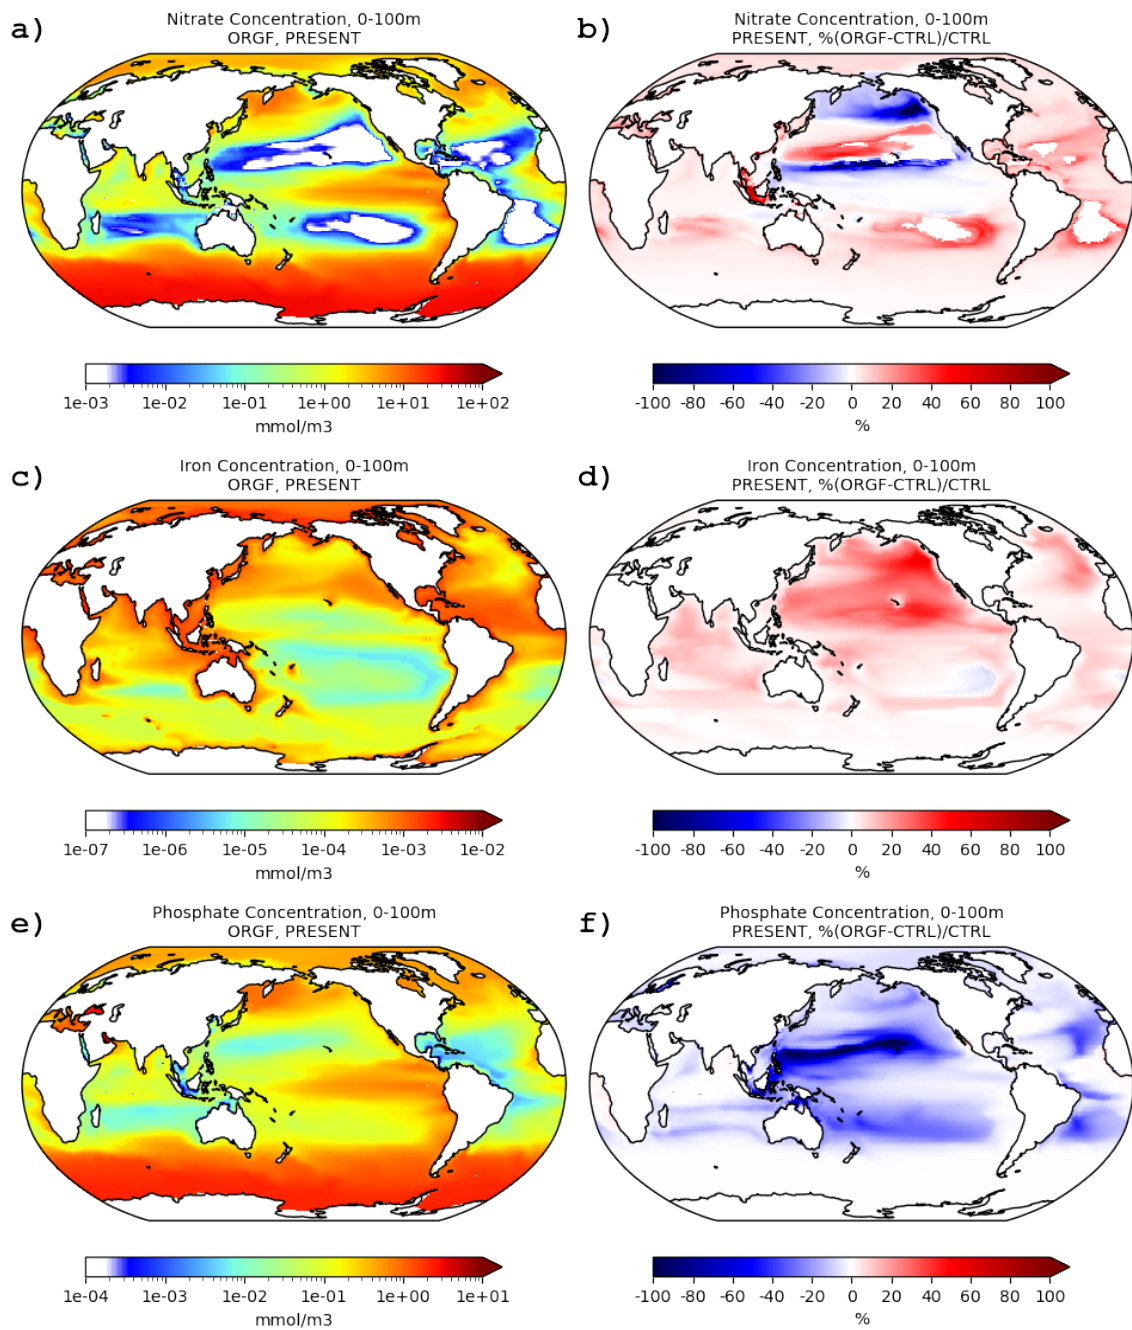

**Figure S2: Oceanic concentrations averaged over the upper 100m (left column) of nitrate (a), iron (c) and phosphate (e) as calculated by the model for the ORGF simulation for PRESENT (2001–2020 average), and the respective percentage differences (b,d,f) compared to the CTRL simulation (right column).**
